# Supplementary material for: IMMUNE PROFILES TO DISTINGUISH HOSPITALIZED VERSUS AMBULATORY COVID-19 CASES IN OLDER PATIENTS
Source: bioRxiv or medRxiv preprint supplement (doi:10.1101/2022.06.23.22276820), 2022-06-27
Supplement: Supplementary file [file media-1.pdf]

# Suppl Figure 1

(a)

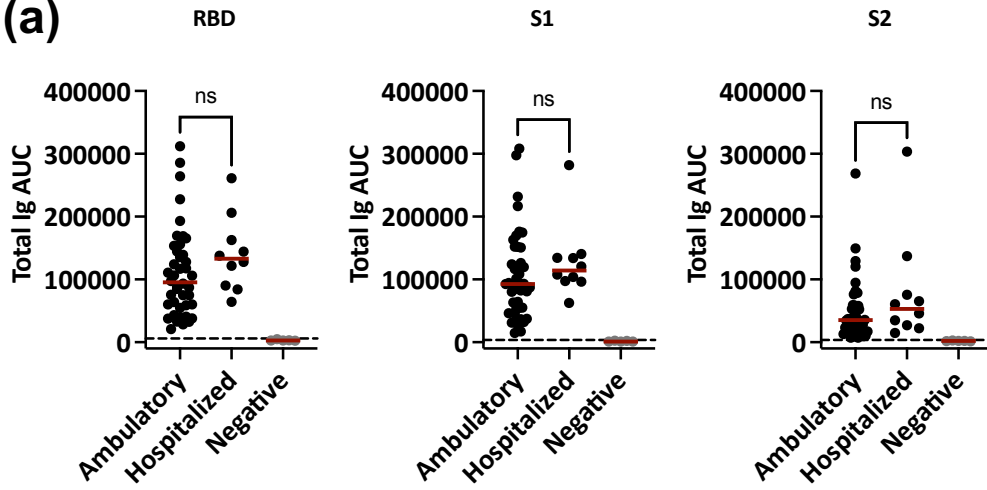

(b)

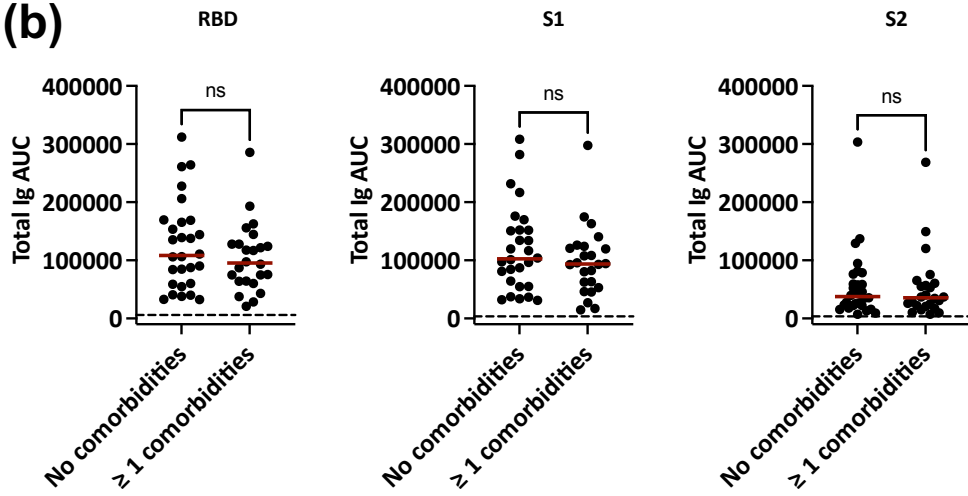

(c)

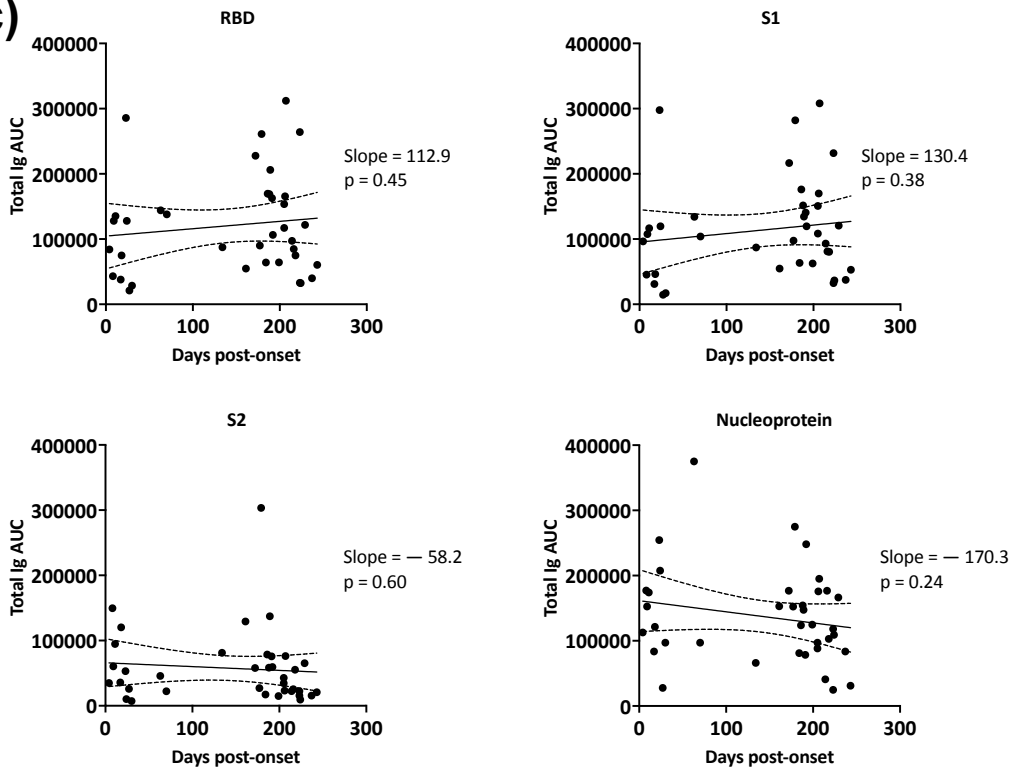

# Suppl Figure 2

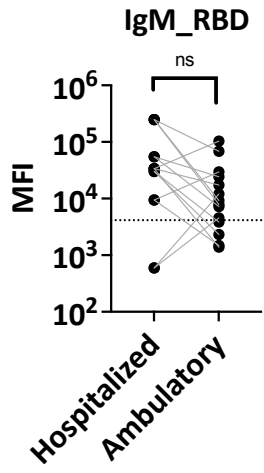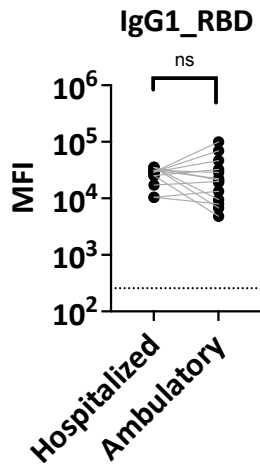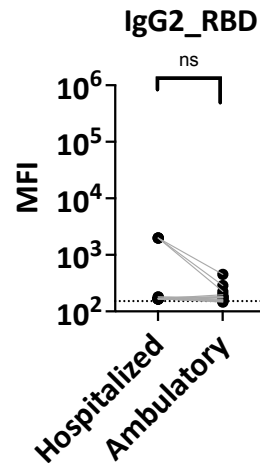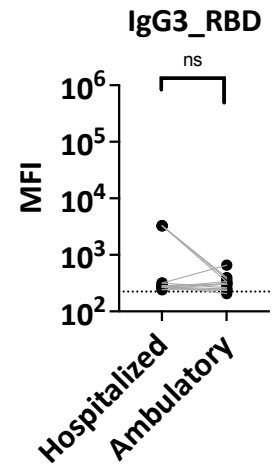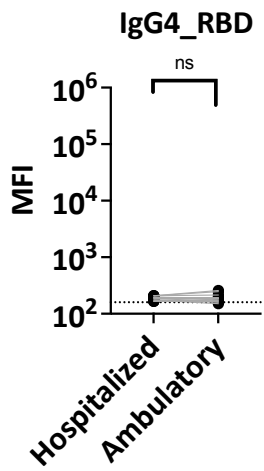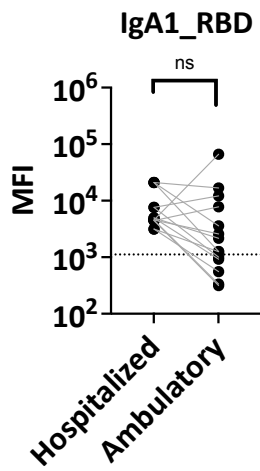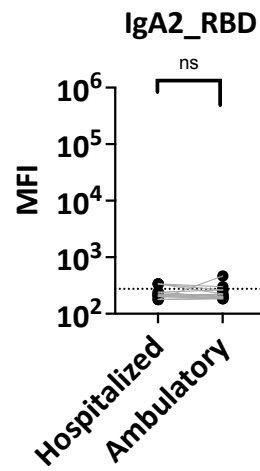

# Suppl Figure 3

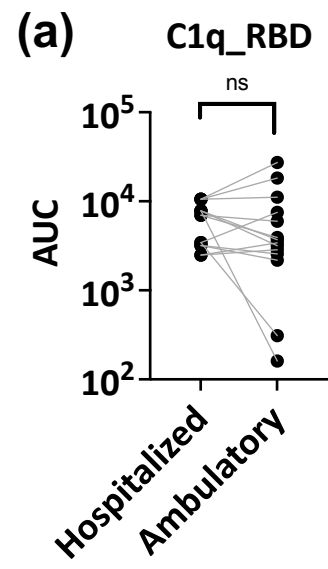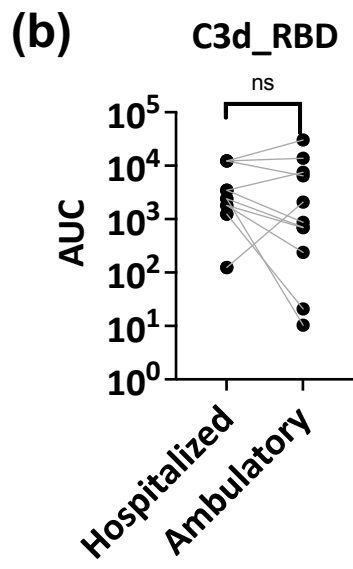

# Suppl Figure 4

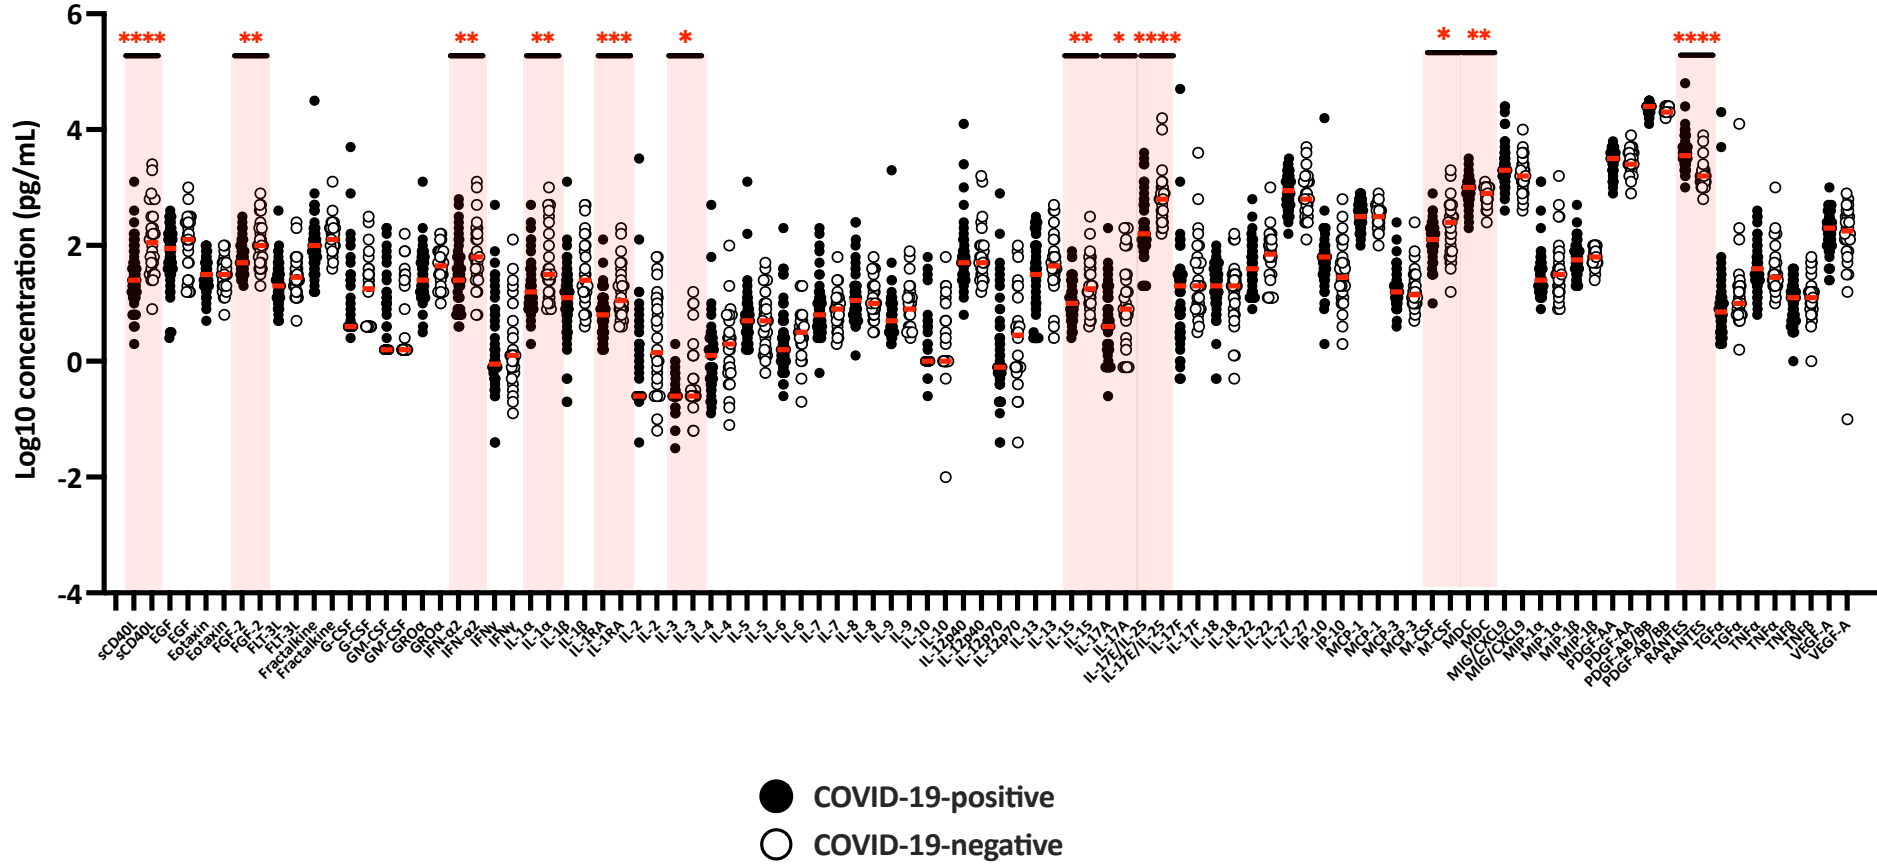

# Suppl Figure 5

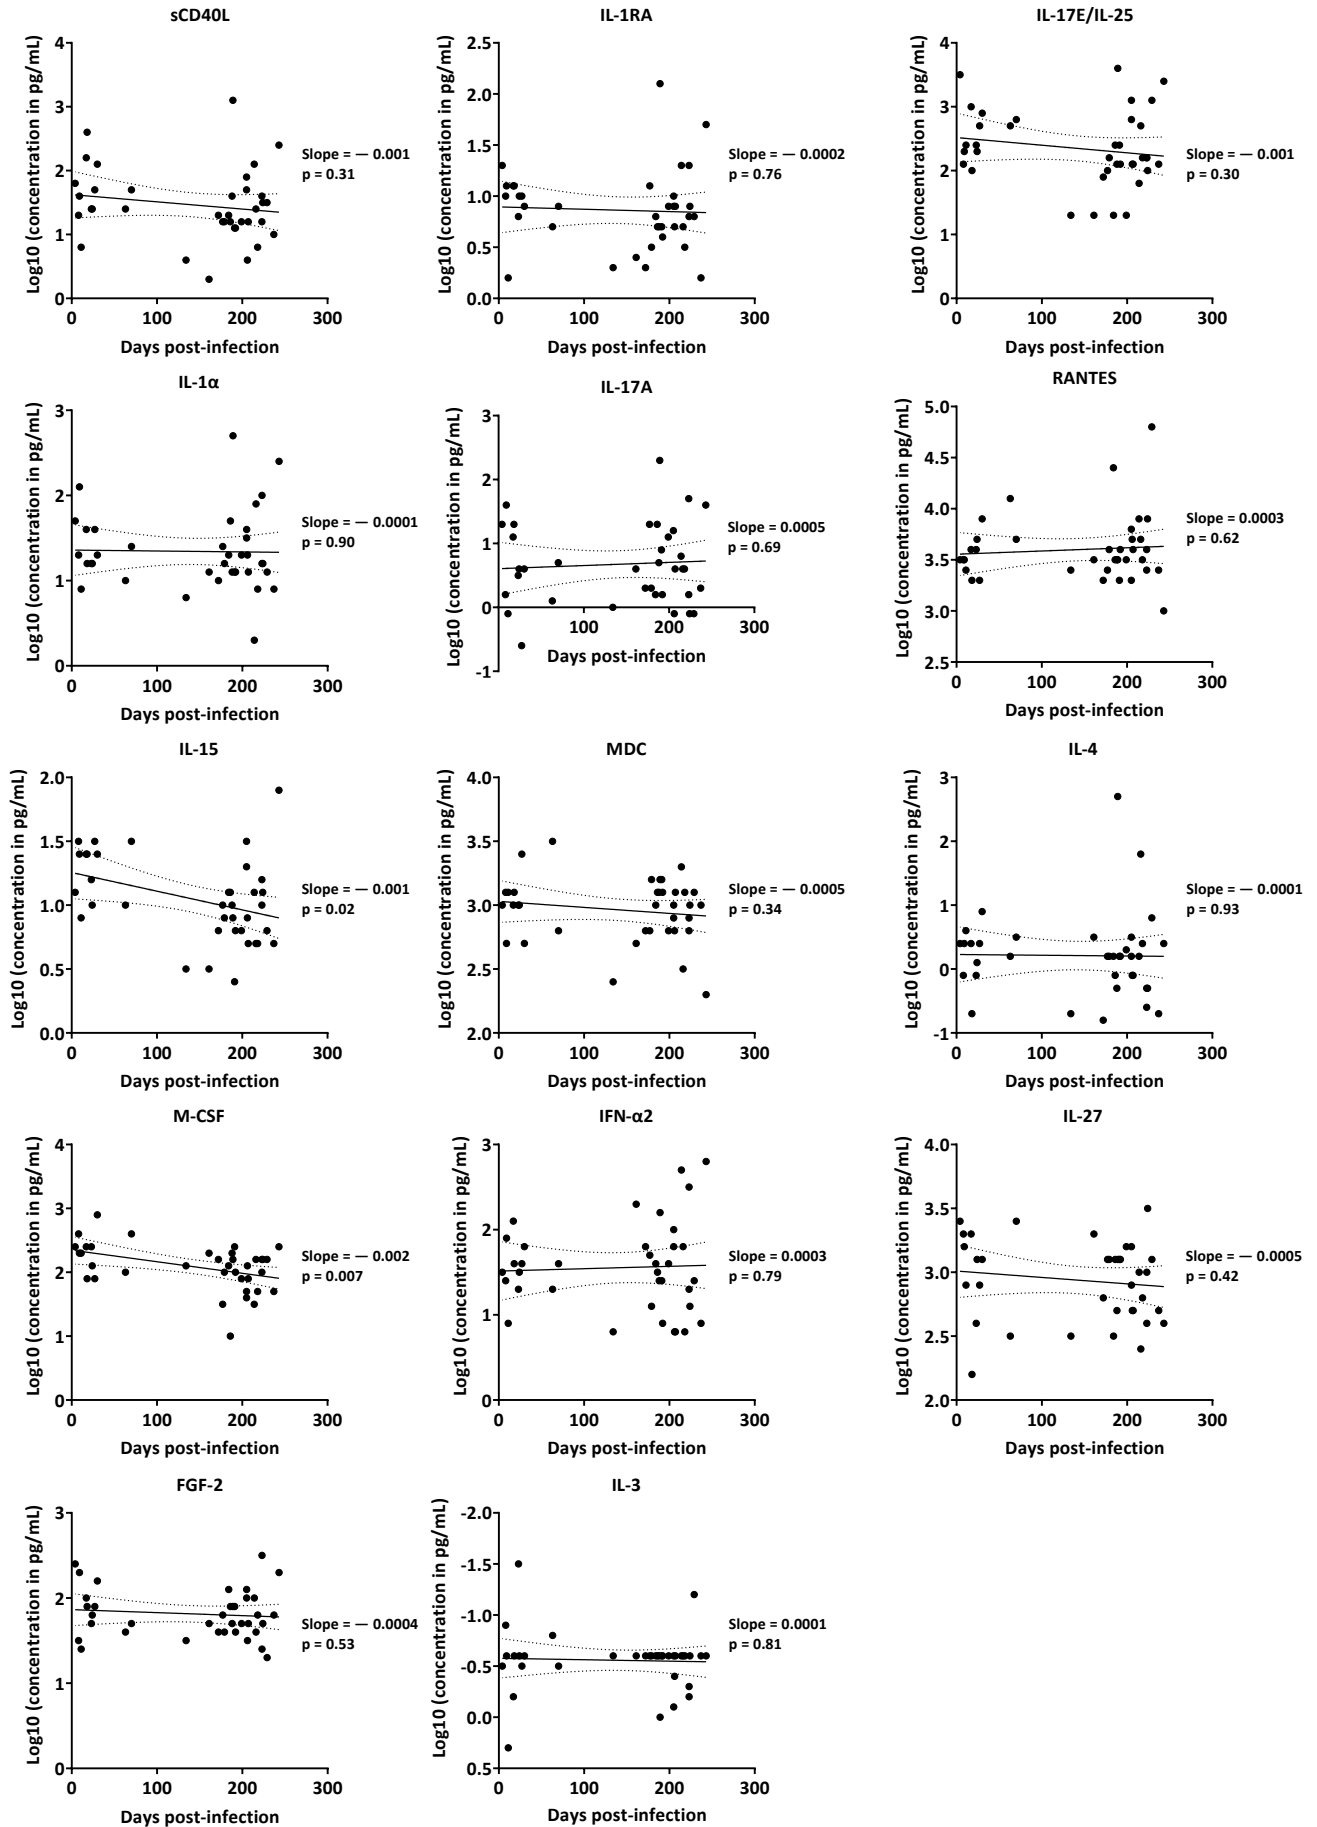

# Suppl Figure 6

(a)

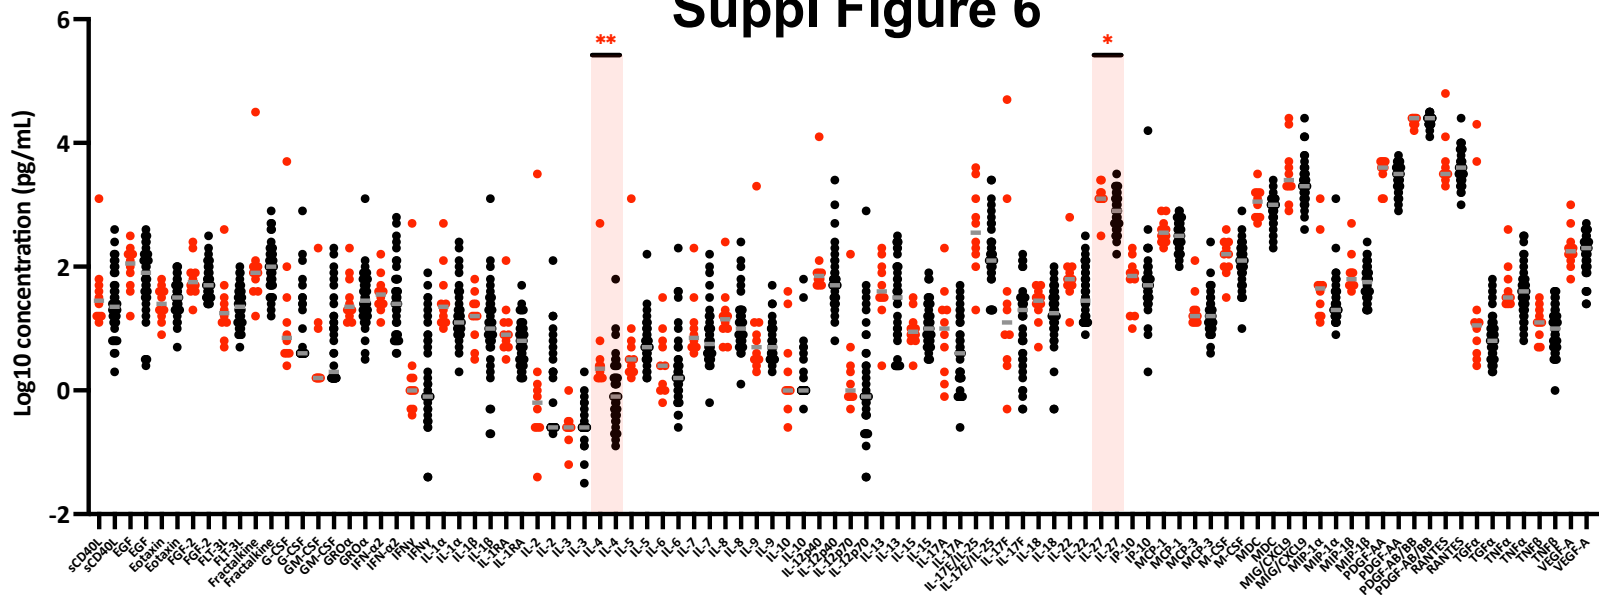

(b)

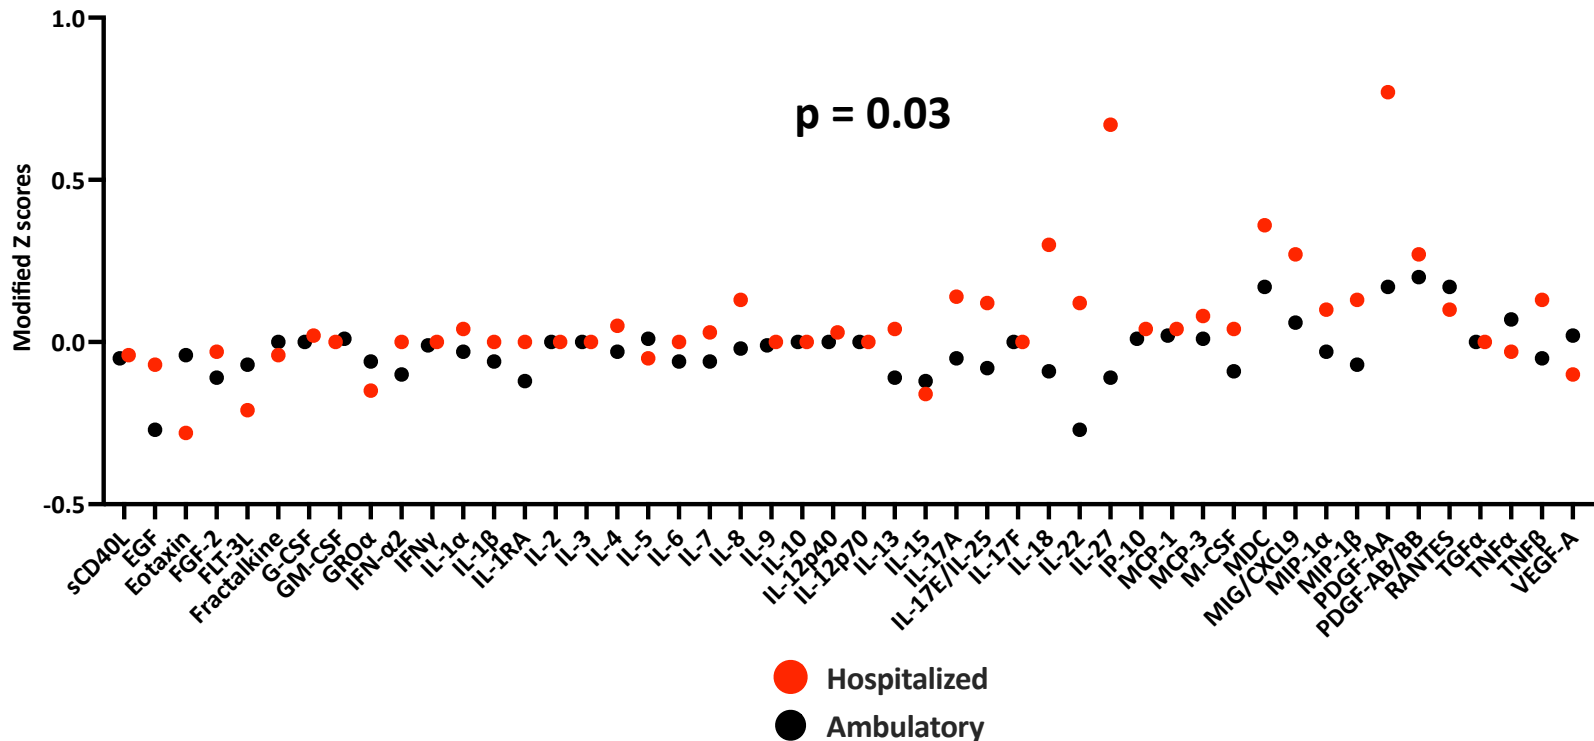

# Suppl Figure 7

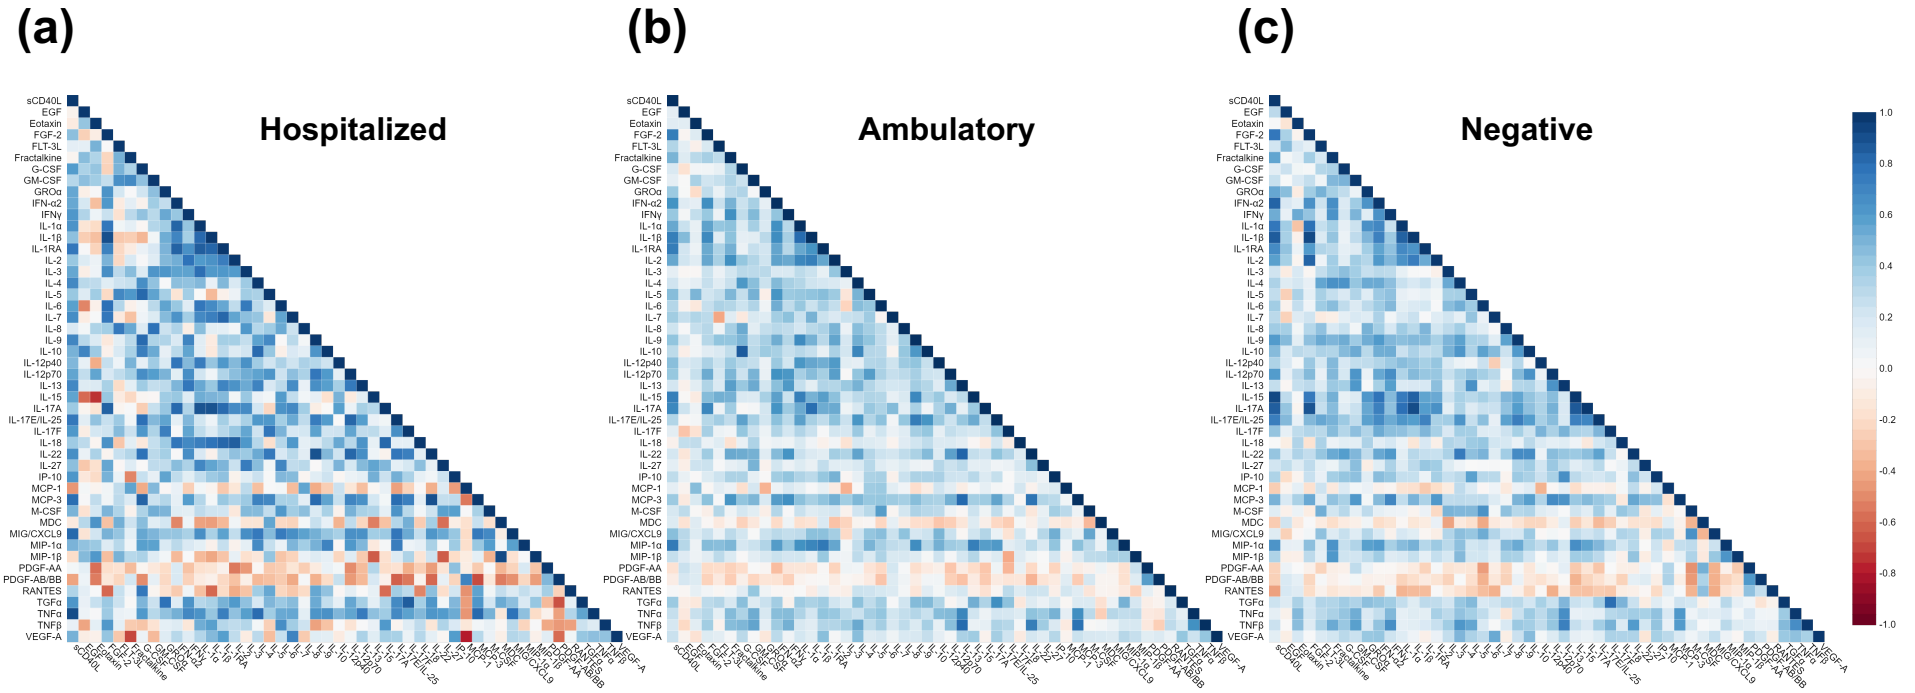

**Supplemental Table 1: Clinical data of all COVID-19-infected patients in the VA cohort (n = 52).**

| Code   | Age   | Sex | Clinical symptoms         | Severity     | Comorbidities                                           | Race  | Ethnicity | Serum collection (Days post-infection) |
|--------|-------|-----|---------------------------|--------------|---------------------------------------------------------|-------|-----------|----------------------------------------|
| CVAP1  | 40-44 | M   | Bilateral pneumonia       | Hospitalized |                                                         | White | Hispanic  | 177                                    |
| CVAP2  | 75-79 | M   |                           | Ambulatory   |                                                         | Black |           | 11                                     |
| CVAP3  | 70-74 | M   | Pneumonia                 | Hospitalized |                                                         | Black |           | 189                                    |
| CVAP4  | 60-64 | M   |                           | Ambulatory   |                                                         | White | Hispanic  | 172                                    |
| CVAP6  | 70-74 | M   |                           | Ambulatory   |                                                         | Black |           | 192                                    |
| CVAP7  | 80-84 | M   |                           | Ambulatory   |                                                         | White | Hispanic  | 17                                     |
| CVAP8  | 30-34 | M   |                           | Ambulatory   |                                                         | White | Hispanic  | 224                                    |
| CVAP9  | 90-94 | M   | Pneumonia                 | Hospitalized |                                                         | Black | Hispanic  | 179                                    |
| CVAP10 | 50-54 | F   |                           | Ambulatory   |                                                         | Black | Hispanic  | 186                                    |
| CVAP12 | 40-44 | F   |                           | Ambulatory   |                                                         | Black |           | 188                                    |
| CVAP13 | 50-54 | M   |                           | Ambulatory   |                                                         | White | Hispanic  | 206                                    |
| CVAP14 | 55-59 | M   |                           | Ambulatory   |                                                         | White | Hispanic  | 207                                    |
| CVAP15 | 45-49 | M   |                           | Hospitalized |                                                         | Black |           | 63                                     |
| CVAP16 | 55-59 | M   | Bilateral pneumonia       | Hospitalized |                                                         | White | Hispanic  | 70                                     |
| CVAP17 | 80-84 | M   | Gastrointestinal bleeding | Hospitalized |                                                         | Black |           | 4                                      |
| CVAP18 | 75-79 | M   |                           | Ambulatory   |                                                         | White |           | /                                      |
| CVAP19 | 55-59 | M   |                           | Ambulatory   |                                                         | White | Hispanic  | 161                                    |
| CVAP20 | 65-69 | M   |                           | Ambulatory   | Obesity, asthma                                         | Black |           | 218                                    |
| CVAP21 | 45-49 | F   |                           | Ambulatory   |                                                         | Black |           | /                                      |
| CVAP22 | 35-39 | M   |                           | Ambulatory   | Obesity                                                 | White | Hispanic  | /                                      |
| CVAP23 | 70-74 | M   | Bilateral pneumonia       | Hospitalized | Chronic obstructive pulmonary disease (COPD)            | Black |           | 229                                    |
| CVAP24 | 75-79 | M   |                           | Ambulatory   |                                                         | White |           | 216                                    |
| CVAP25 | 65-69 | M   |                           | Ambulatory   | Asthma, hypertension                                    | White | Hispanic  | /                                      |
| CVAP26 | 70-74 | M   | Mild infiltration         | Hospitalized | Coronary artery disease (CAD)                           | White |           | 191                                    |
| CVAP27 | 60-64 | M   |                           | Ambulatory   | Prostate cancer                                         | White |           | /                                      |
| CVAP28 | 60-64 | M   |                           | Ambulatory   | Chronic obstructive pulmonary disease (COPD), emphysema | Black | Hispanic  | /                                      |
| CVAP29 | 70-74 | M   |                           | Ambulatory   | Hypertension                                            | White | Hispanic  | /                                      |
| CVAP30 | 55-59 | M   |                           | Ambulatory   | Obesity, hypertension                                   | Black |           | /                                      |
| CVAP31 | 65-69 | M   |                           | Ambulatory   | Asthma, hypertension                                    | Black |           | 214                                    |
| CVAP32 | 55-59 | M   |                           | Ambulatory   | Obesity                                                 | Black |           | 184                                    |



|               |       |   |                     |              |                                                                       |       |          |     |
|---------------|-------|---|---------------------|--------------|-----------------------------------------------------------------------|-------|----------|-----|
| <b>CVAP33</b> | 75-79 | M |                     | Ambulatory   |                                                                       | White | Hispanic | /   |
| <b>CVAP34</b> | 70-74 | M |                     | Ambulatory   | Hypertension                                                          | White | Hispanic | /   |
| <b>CVAP35</b> | 35-39 | F |                     | Ambulatory   |                                                                       | White |          | /   |
| <b>CVAP36</b> | 75-79 | M |                     | Ambulatory   | Diabetes mellitus (DM)                                                | Black | Hispanic | /   |
| <b>CVAP37</b> | 65-69 | M |                     | Ambulatory   | HIV                                                                   | Black |          | /   |
| <b>CVAP38</b> | 75-79 | M |                     | Ambulatory   | Diabetes mellitus (DM), coronary artery disease (CAD)                 | White |          | 205 |
| <b>CVAP39</b> | 50-54 | F |                     | Ambulatory   |                                                                       | Black |          | 205 |
| <b>CVAP40</b> | 40-44 | M | Bilateral pneumonia | Hospitalized | Diabetes mellitus, obesity                                            | White | Hispanic | 199 |
| <b>CVAP41</b> | 55-59 | M |                     | Ambulatory   |                                                                       | Black |          | 134 |
| <b>CVAP42</b> | 75-79 | M |                     | Ambulatory   | Prostate cancer, hypertension                                         | White | Hispanic | 24  |
| <b>CVAP43</b> | 55-59 | F |                     | Ambulatory   |                                                                       | Black |          | 237 |
| <b>CVAP44</b> | 55-59 | M |                     | Ambulatory   |                                                                       | Black |          | /   |
| <b>CVAP45</b> | 40-44 | F |                     | Ambulatory   |                                                                       | Black |          | 223 |
| <b>CVAP46</b> | 55-59 | F |                     | Ambulatory   |                                                                       | Black |          | 223 |
| <b>CVAP47</b> | 80-84 | M |                     | Ambulatory   | Prostate cancer, hypertension                                         | Black | Hispanic | 243 |
| <b>CVAP49</b> | 60-64 | M | Bilateral pneumonia | Hospitalized | Pulmonary sarcoidosis, asthma                                         |       |          | 9   |
| <b>CVAP50</b> | 35-39 | F |                     | Ambulatory   |                                                                       | White | Hispanic | /   |
| <b>CVAP51</b> | 65-69 | M |                     | Ambulatory   | End stage renal disease (ESRD)                                        | White |          | 30  |
| <b>CVAP52</b> | 45-49 | F |                     | Ambulatory   | Ulcerative colitis                                                    | Black |          | 27  |
| <b>CVAP53</b> | 60-64 | M |                     | Ambulatory   | HIV, coronary artery disease (CAD), diabetes mellitus (DM)            | White |          | 23  |
| <b>CVAP54</b> | 70-74 | M |                     | Ambulatory   | End stage renal disease (ESRD)                                        | Black |          | 8   |
| <b>CVAP55</b> | 80-84 | M |                     | Ambulatory   | Chronic obstructive pulmonary disease (COPD), pulmonary embolism (PE) | Black | Hispanic | 18  |

/: no data available and excluded in Figure 1E.

Supplemental Table 2. Clinical data of hospitalized and ambulatory COVID-19 patients matched for sex, days post-infection, total Ig and comorbidities (six sets, n = 20 total).

|       | Code   | Sex | Days post-infection | Comorbidities | Spike-specific total Ig AUC | Severity     | Clinical symptoms                |
|-------|--------|-----|---------------------|---------------|-----------------------------|--------------|----------------------------------|
| Set 1 | CVAP1  | M   | 177                 | No            | 80083                       | Hospitalized | Bilateral Interstitial Pneumonia |
|       | CVAP24 | M   | 216                 | No            | 71073                       | Ambulatory   |                                  |
|       | CVAP41 | M   | 134                 | No            | 101739                      | Ambulatory   |                                  |
| Set 2 | CVAP3  | M   | 189                 | No            | 257621                      | Hospitalized | Pneumonia                        |
|       | CVAP4  | M   | 172                 | No            | 212313                      | Ambulatory   |                                  |
|       | CVAP13 | M   | 206                 | No            | 184248                      | Ambulatory   |                                  |
|       | CVAP14 | M   | 207                 | No            | 284795                      | Ambulatory   |                                  |
| Set 3 | CVAP17 | M   | 4                   | No            | 79206                       | Hospitalized | Gastrointestinal bleeding        |
|       | CVAP2  | M   | 11                  | No            | 132416                      | Ambulatory   |                                  |
|       | CVAP7  | M   | 17                  | No            | 48953                       | Ambulatory   |                                  |
| Set 4 | CVAP23 | M   | 229                 | Yes           | 157024                      | Hospitalized | Bilateral Interstitial Pneumonia |
|       | CVAP31 | M   | 214                 | Yes           | 82607                       | Ambulatory   |                                  |
|       | CVAP38 | M   | 205                 | Yes           | 120391                      | Ambulatory   |                                  |
| Set 5 | CVAP40 | M   | 199                 | Yes           | 56680                       | Hospitalized | Bilateral Interstitial Pneumonia |
|       | CVAP20 | M   | 218                 | Yes           | 87902                       | Ambulatory   |                                  |
|       | CVAP32 | M   | 184                 | Yes           | 83676                       | Ambulatory   |                                  |
| Set 6 | CVAP49 | M   | 9                   | Yes           | 127891                      | Hospitalized | Bilateral Interstitial Pneumonia |
|       | CVAP42 | M   | 24                  | Yes           | 172417                      | Ambulatory   |                                  |
|       | CVAP54 | M   | 8                   | Yes           | 88384                       | Ambulatory   |                                  |
|       | CVAP55 | M   | 18                  | Yes           | 71418                       | Ambulatory   |                                  |
